# Supplementary material for: Probing the thermal-enhanced catalytic activity of CO oxidation over Pd/OMS-2 catalysts
Source: Royal Society of Chemistry journal article supplement (doi:10.1039/c7ra07814e), 2017-01-01
Supplement: c7ra07814e1.pdf [file c7ra07814e1.pdf]

Electronic Supplementary Information (ESI):

## Probing A Thermal-enhanced Catalytic Activity of CO Oxidation over Pd/OMS-2 Catalysts

Xin Liu, Qiulin Zhang\*, Ping Ning\*, Qixian Liu, Zhongxian Song, YanKang Duan

*Faculty of Environmental Science and Engineering, Kunming University of Science and Technology, Kunming, 650500, PR China.*

### Kinetic study

Effects of CO concentrations and temperature on CO oxidation rate at 323 K are shown in **Fig. S1**. Rate of catalytic reaction is calculated as follow:

$$r = c \cdot X \cdot V / m$$

Where  $r$  represents reaction rate of CO oxidation (Rate of CO conversion  $10^{-6}$  mol/(g•min)),  $c$  is the initial concentration of CO (mol/cm<sup>3</sup>),  $X$  is the CO conversion (%),  $V$  is the reaction mixture flow rate (cm<sup>3</sup>/min),  $m$  is the catalyst weight (g)

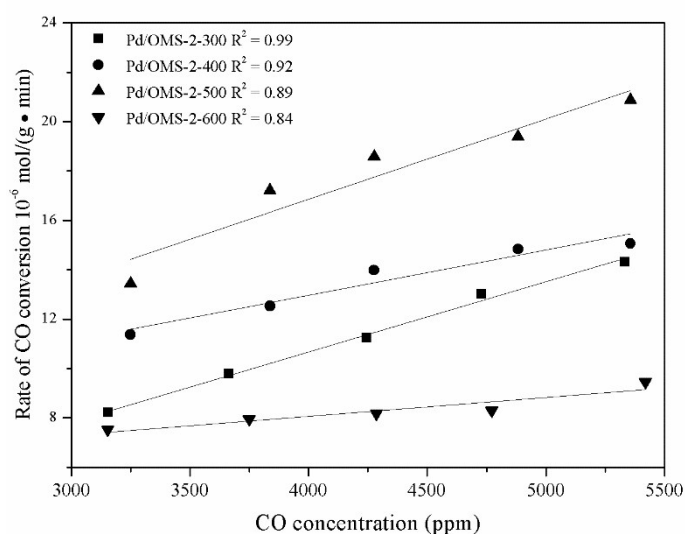

**Fig. S1** Effects of CO concentration and temperature on the CO oxidation rate over various catalysts at 323K.

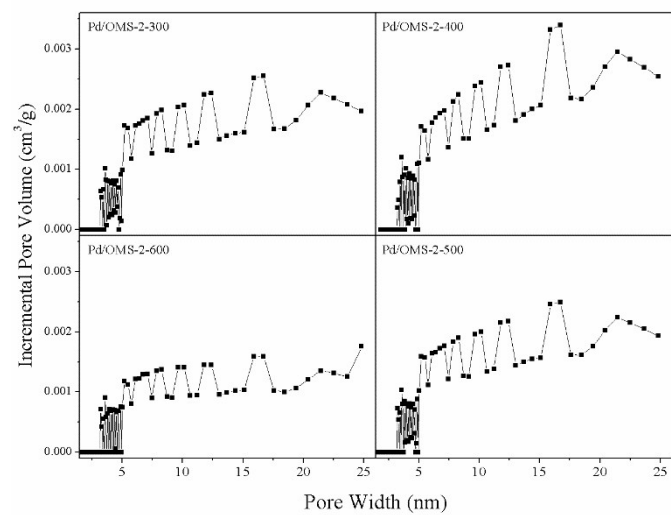

**Fig.S2** Pore-size distribution of the various Pd/OMS-2 catalysts

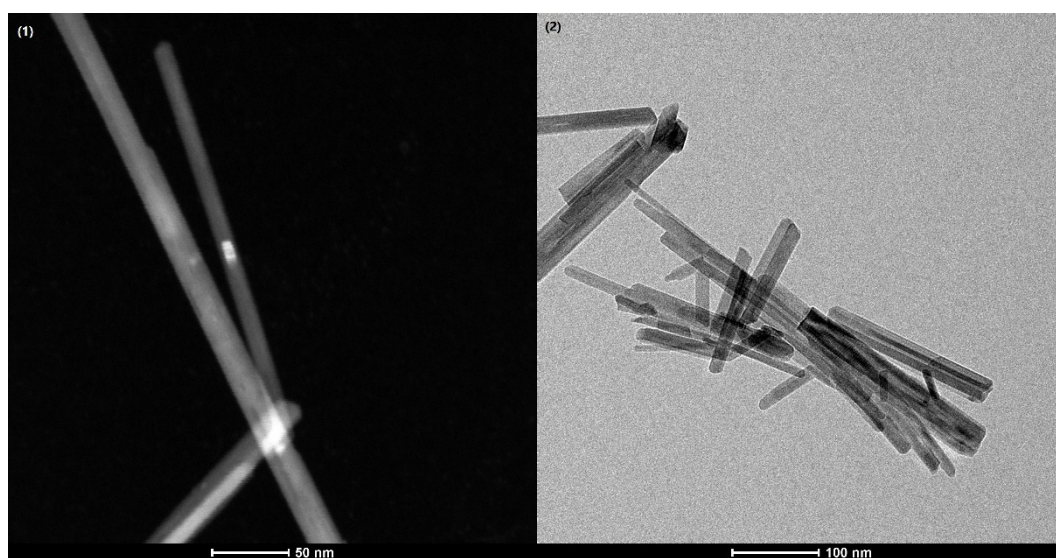

**Fig. S3** (1) STEM and (2) TEM images of Pd/OMS-2-300

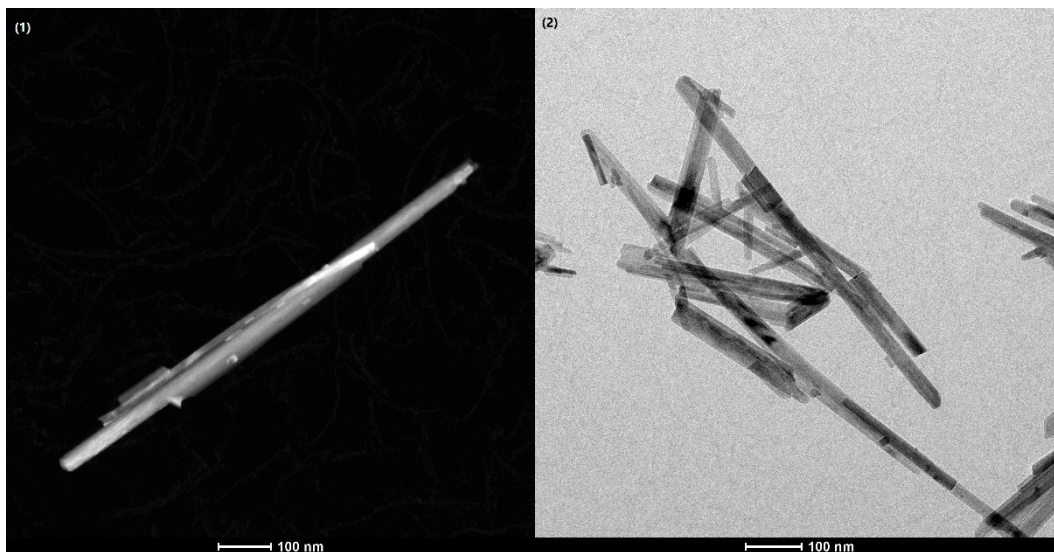

**Fig. S4** (1) STEM and (2) TEM images of Pd/OMS-2-400

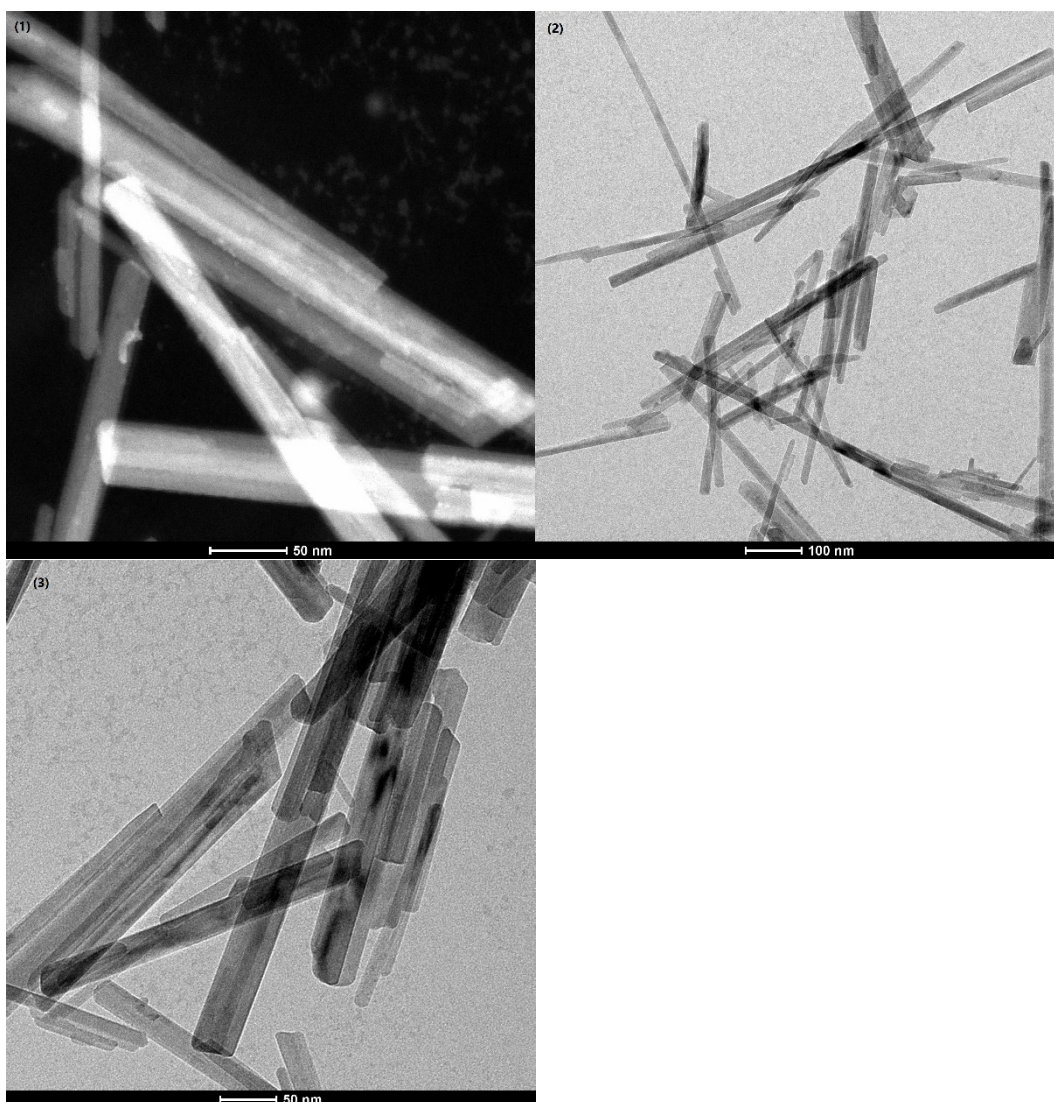

**Fig. S5** (1) STEM and (2), (3) TEM images of Pd/OMS-2-500

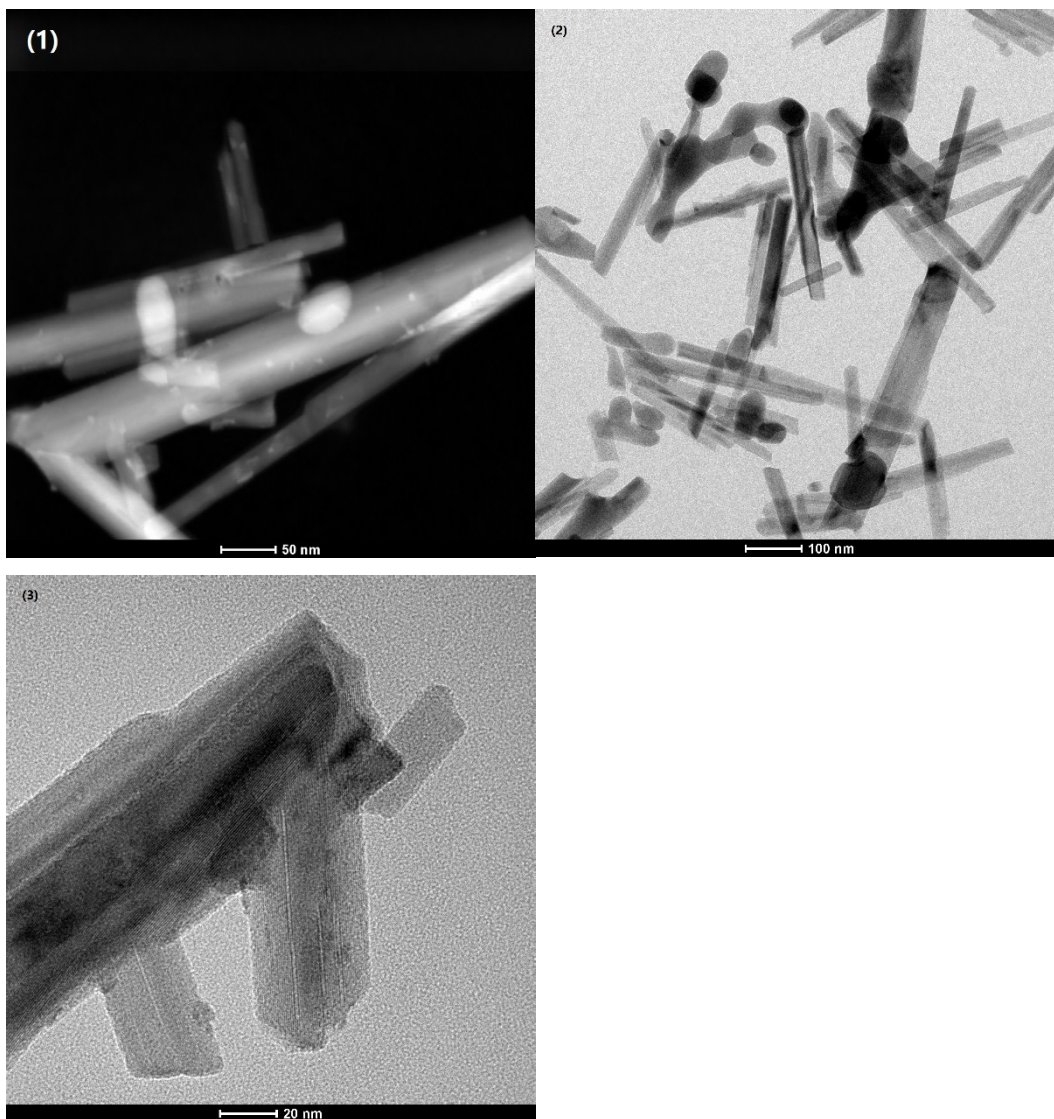

**Fig. S6** (1) STEM and (2), (3) TEM images of Pd/OMS-2-600



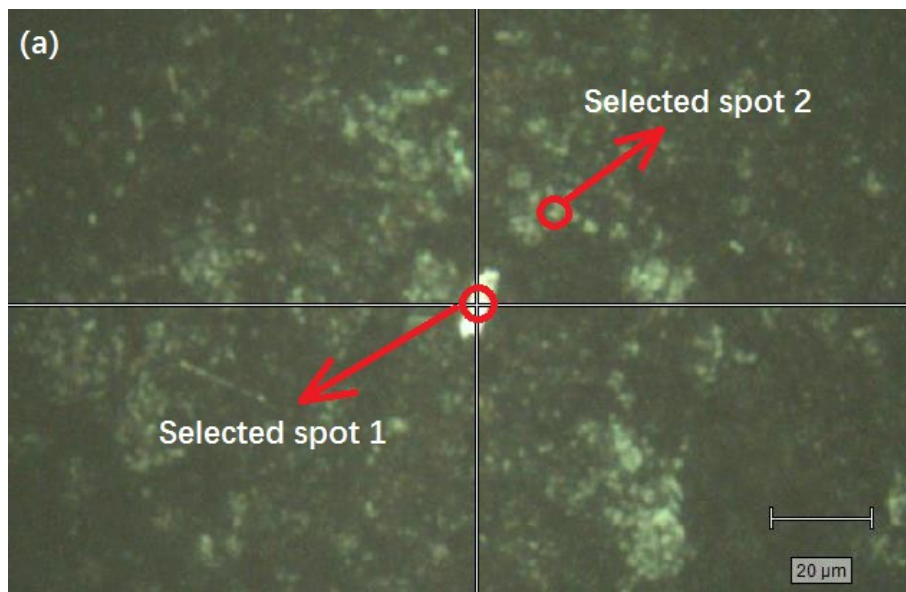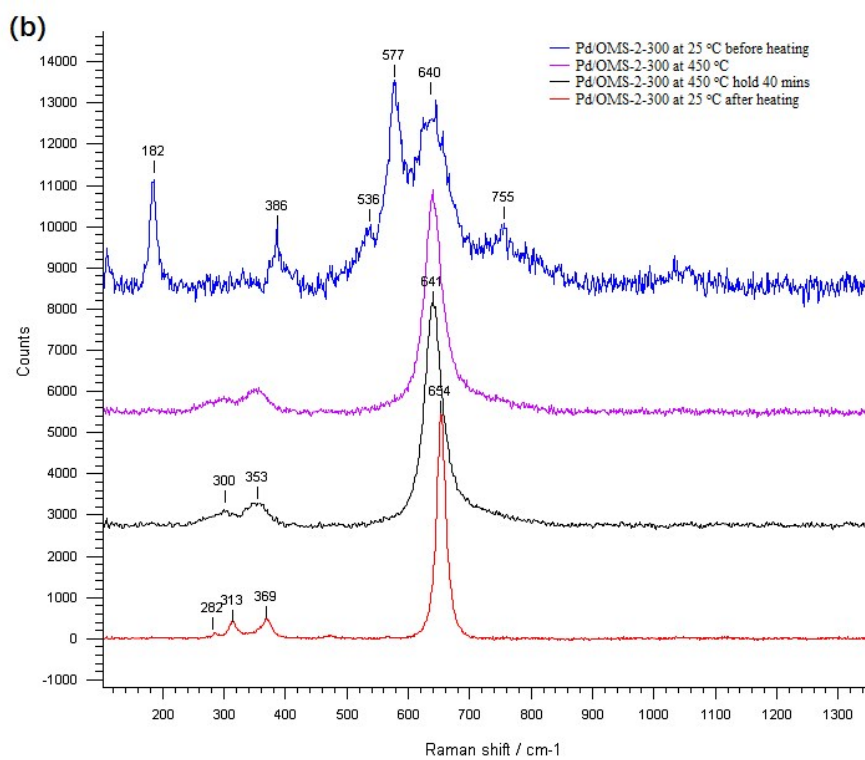

**Fig. S7** (a) Optical microscope image and selected spots of Pd/OMS-2-300 catalyst, (b) in-situ Raman spectroscopy of the selected spot 1 over Pd/OMS-2-300 catalyst. (c) in-situ Raman spectroscopy of the selected spot 2 over Pd/OMS-2-300 catalyst

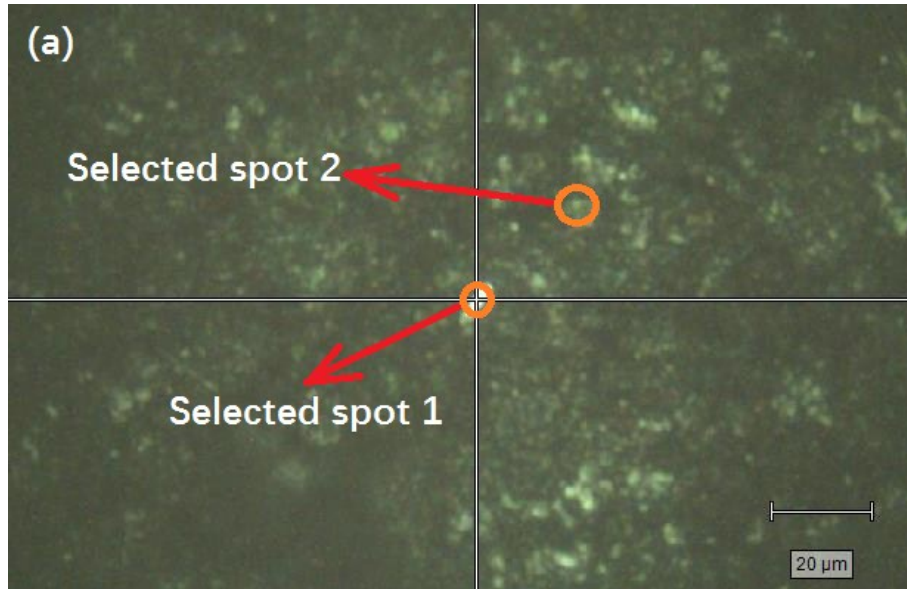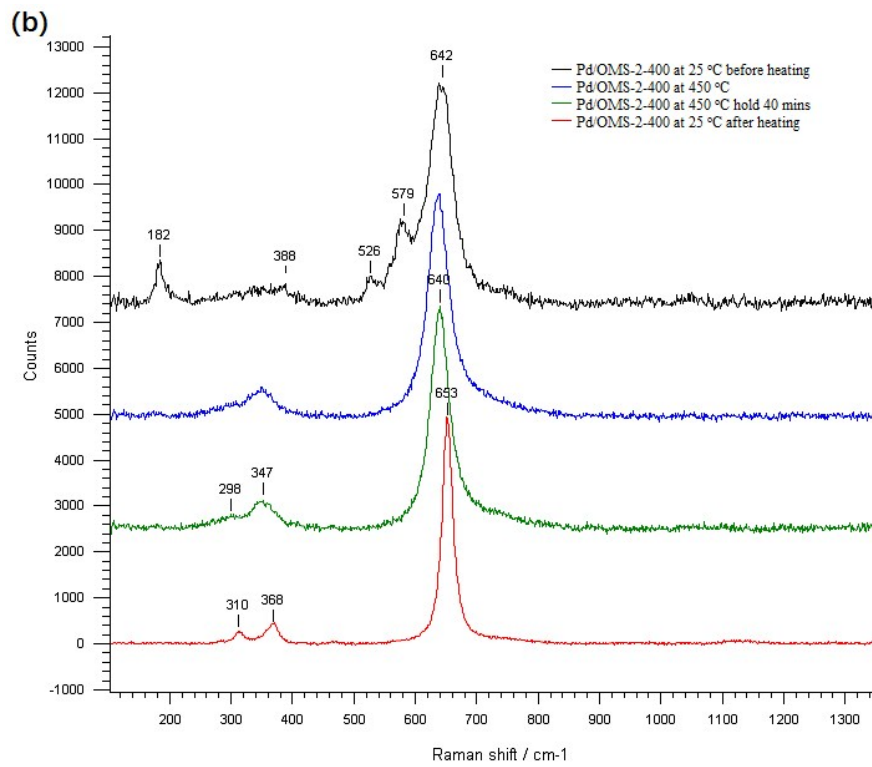

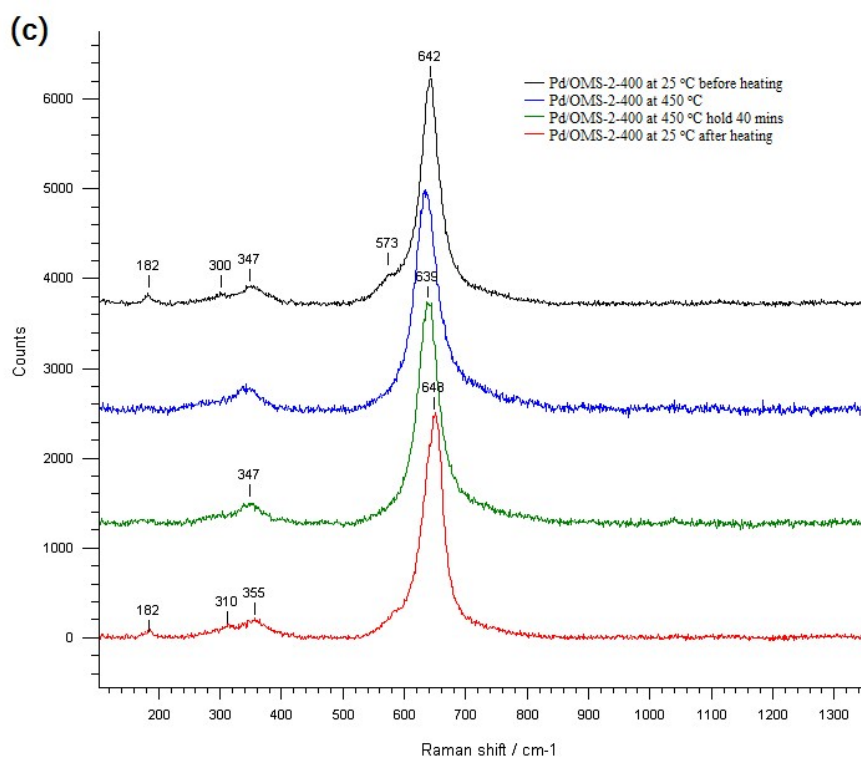

**Fig. S8** (a) Optical microscope image and selected spots of Pd/OMS-2-400 catalyst, (b) in-situ Raman spectroscopy of the selected spot 1 over Pd/OMS-2-400 catalyst. (c) in-situ Raman spectroscopy of the selected spot 2 over Pd/OMS-2-400 catalyst

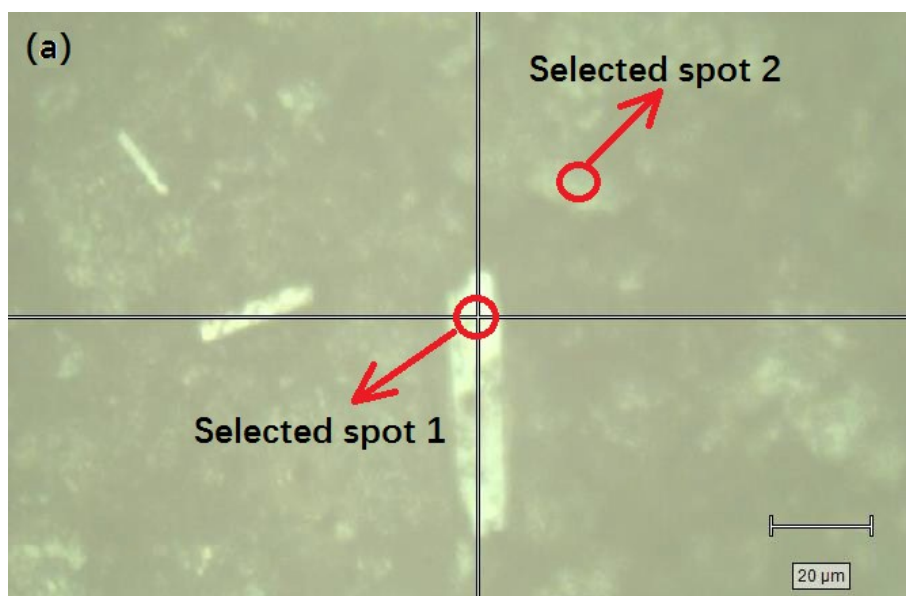

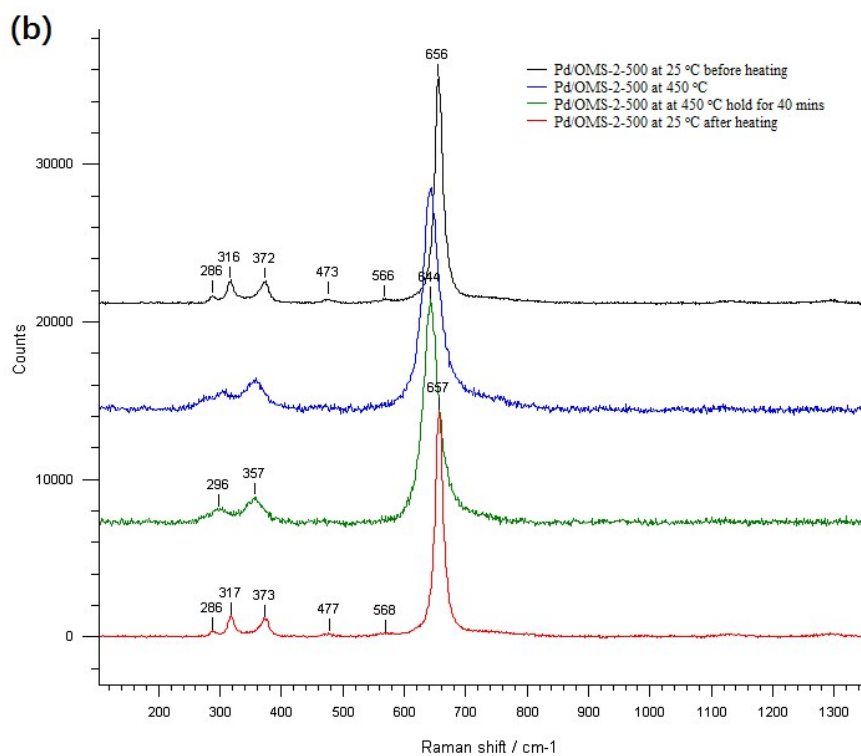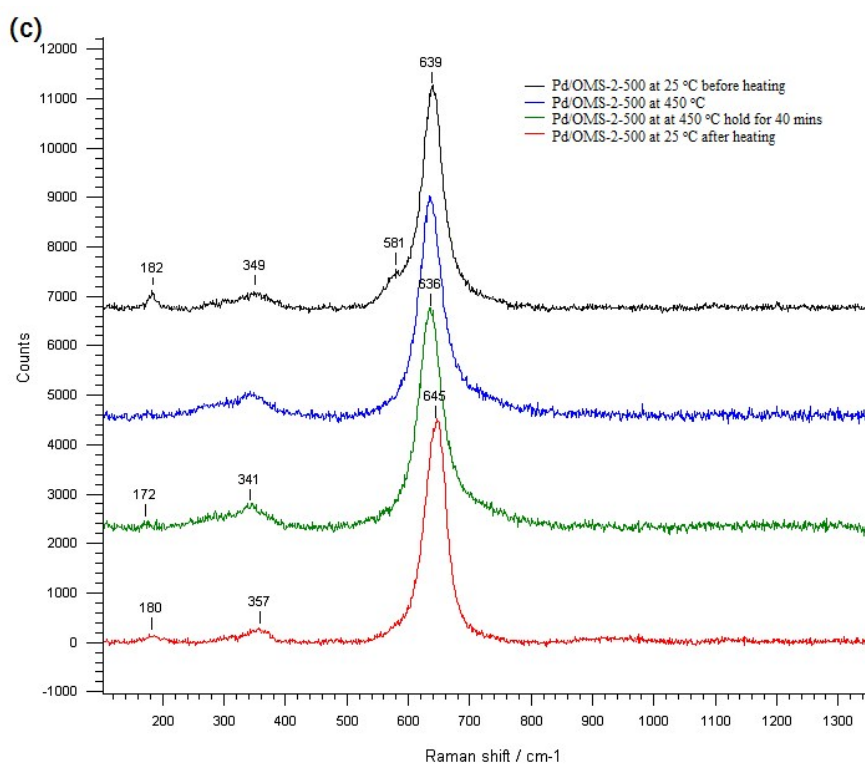

**Fig. S9** (a) Optical microscope image and selected spots of Pd/OMS-2-500 catalyst, (b) in-situ Raman spectroscopy of the selected spot 1 over Pd/OMS-2-500 catalyst. (c) in-situ Raman spectroscopy of the selected spot 2 over Pd/OMS-2-500 catalyst



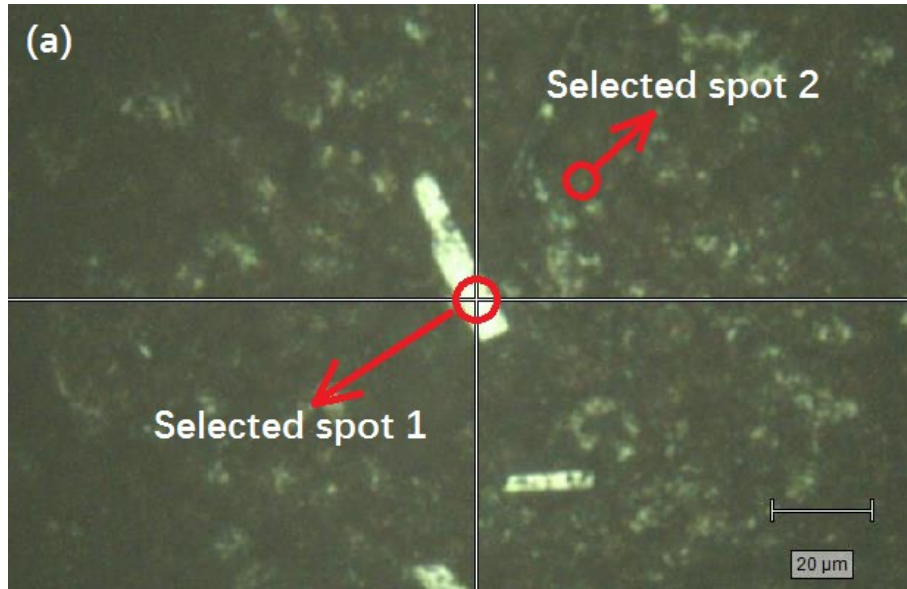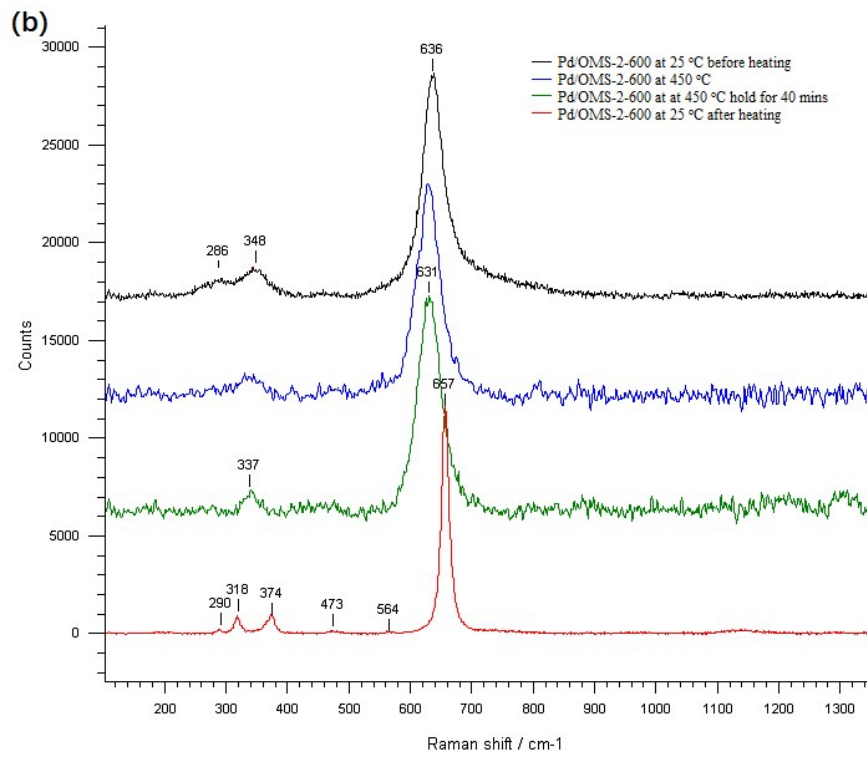

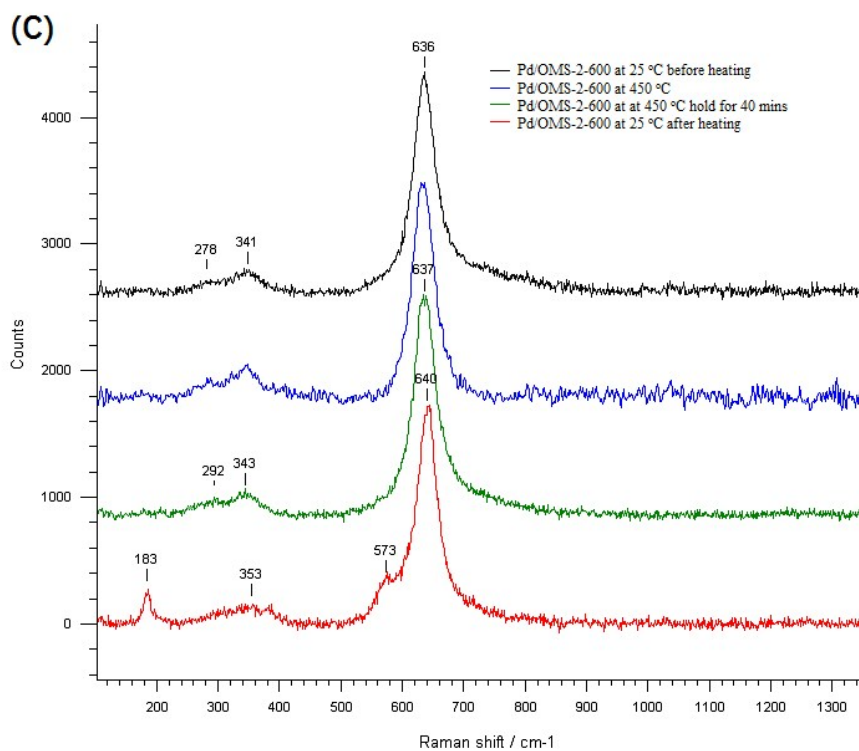

**Fig. S10** (a) Optical microscope image and selected spots of Pd/OMS-2-600 catalyst, (b) in-situ Raman spectroscopy of the selected spot 1 over Pd/OMS-2-600 catalyst. (c) in-situ Raman spectroscopy of the selected spot 2 over Pd/OMS-2-600 catalyst

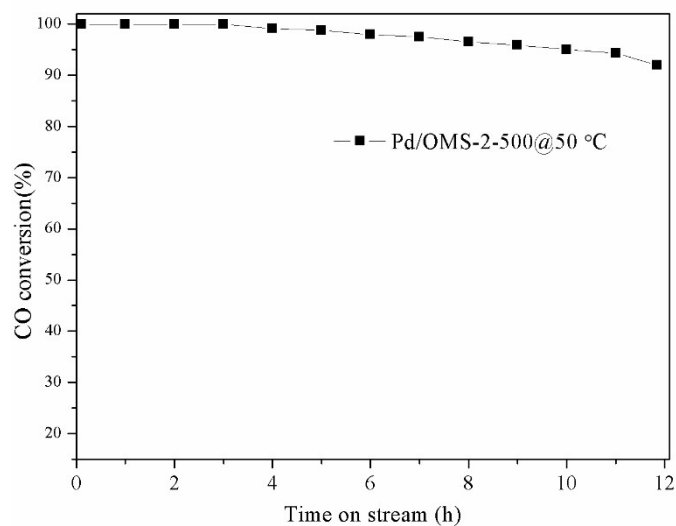

**Fig. S11** Stability test of the Pd/OMS-2-500 catalyst under 50 °C (Reaction conditions: 200mg of the sample, 1.0 vol % CO, 10.5 vol% O<sub>2</sub>, N<sub>2</sub> balanced, 50ml/min of total flow rate).

**Table S1** Catalytic oxidation of CO over manganese oxides and manganese oxides supported noble-metal catalysts

| Catalysts                             | GHSV<br>(ml•g <sup>-1</sup> •h <sup>-1</sup> ) | T <sub>50</sub><br>(°C) | T <sub>90</sub><br>(°C) | T <sub>99</sub><br>(°C) | E <sub>a</sub><br>(kJ/mol) | Noble metal<br>content (wt %) | Ref.      |
|---------------------------------------|------------------------------------------------|-------------------------|-------------------------|-------------------------|----------------------------|-------------------------------|-----------|
| MnO <sub>x</sub>                      | 21428                                          | ---                     | ---                     | 27                      | 17                         | 0                             | [1]       |
| MnO <sub>x</sub>                      | 7500                                           | ---                     | 200                     | 225                     | 28.7                       | 0                             | [2]       |
| α-Mn <sub>2</sub> O <sub>3</sub>      | 36000                                          | ---                     | ---                     | 220                     | ---                        | 0                             | [3]       |
| K-OMS-2                               | 12000                                          | ---                     | ---                     | 125                     | 12.6                       | 0                             | [4]       |
| β-MnO <sub>2</sub>                    | 40000                                          | ---                     | 126                     | ---                     | ---                        | 0                             | [5]       |
| Ag/β-MnO <sub>2</sub>                 | 40000                                          | ---                     | 80                      | ---                     | ---                        | 15                            | [5]       |
| Ag-OMS-2                              | 9000                                           | ---                     | ---                     | 90                      | ---                        | Not mentioned                 | [6]       |
| Au/α-MnO <sub>2</sub>                 | 80000                                          | -84                     | ---                     | ---                     | 28.3                       | 1.5                           | [7]       |
| Au/β-MnO <sub>2</sub>                 | 80000                                          | -85                     | ---                     | ---                     | 36.5                       | 0.64                          | [7]       |
| Au/α-MnO <sub>2</sub>                 | 150000                                         | -21                     | ---                     | 270                     | 19                         | 2.9                           | [8]       |
| Pd/OMS-2                              | 60000                                          | 25                      | 55                      | 70                      | ---                        | 0.5                           | [9]       |
| Pd/OMS-2                              | 15000                                          | ---                     | ---                     | 35                      | 18.2                       | 1                             | [10]      |
| Pd/OMS-2                              | 15000                                          | ---                     | <20                     | 35                      | 12.8                       | 1                             | This work |
| Pd/MnO <sub>x</sub> -CeO <sub>2</sub> | 40000                                          | ---                     | ---                     | <50                     | ---                        | 1                             | [11]      |

## References

- [1] V. Iablokov, K. Frey, O. Geszti and N. Kruse, Catal. Lett., 2010, 134, 210-216

- 
- [2] S. Y. Chen, W. Song, H. J. Lin, S. Wang, S. Biswas, M. Mollahosseini, C. H. Kuo, P. X. Gao and S. L. Suib, *ACS Appl. Mater. Interfaces*, 2016, 8, 7834-7842
- [3] Y. Luo, Y. Q. Deng, W. Mao, X. J. Yang, K. Zhu, J. Xu and Yi-Fan Han, *J. Phys. Chem. C* 2012, 116, 20975-20981
- [4] L. Pahalagedara, D. A. Kriz, N. Wasalathanthri, C. Weerakkody, Y. Meng, S. Dissanayake, M. Pahalagedara, Z. Luo, S. L. Suib, P. Nandi, and R. J. Meyer, *Appl. Catal. B: Environ.*, 2017, 204, 411-420
- [5] R. Xu, X. Wang, D. Wang, K. Zhou and Y. Li, *J. Catal*, 2006, 237, 426-430
- [6] J. Chen, J. Li, H. Li, X. Huang and W. Shen, *Micropor. Mesopor. Mat.*, 2008, 116, 586-592
- [7] D. Gu, J. C. Tseng, C. Weidenthaler, H. J. Bongard, B. Spliethoff, W. Schmidt, F. Soulimani, B. M. Weckhuysen and F. Schüth, *J. Am. Chem. Soc.*, 2016, 138 (30), 9572-9580
- [8] L. C. Wang, L. He, Y. M. Liu, Y. Cao, H. Y. He, K. N. Fan and J. H. Zhuang, *J. Catal.*, 2009, 264, 145-153
- [9] L. Liu, Y. Song, Z. Fu, Q. Ye, S. Cheng, T. Kang and H. Dai, *Appl. Surf. Sci.*, 2017, 396, 599-608
- [10] Q. Zhang, Q. Liu, P. Ning, X. Liu, L. Xu, Z. Song, Y. Duan, T. Zhang, *Res. Chem. Intermed.*, 2016: 1-16
- [11] C. Wang, C. Wen, J. Lauterbach and E. Sasmaz, *Appl. Catal. B: Environ.*, 2017, 206 (5), 1-8
